# Supplementary material for: Characterising persons diagnosed with HIV as either recent or long-term using a cross-sectional analysis of recent infection surveillance data collected in Malawi from September 2019 to March 2020
Source: HighWire-hosted journal article supplement (doi:10.1136/bmjopen-2022-064707), 2022-09-01
Supplement: bmjopen-2022-064707supp001_data_supplement.pdf [file bmjopen-2022-064707supp001_data_supplement.pdf]

## Appendix Table:

## Characteristics of RTRI recent cases reclassified as long-term after Viral Load test (n = 338)

| Characteristic       | RTRI recent reclassified LT after VL testing, n(%) |
|----------------------|----------------------------------------------------|
| Number of clients    | 338                                                |
| Sex                  |                                                    |
| Male                 | 70(20.7)                                           |
| Female not pregnant  | 201(59.5)                                          |
| Female pregnant      | 59(17.5)                                           |
| Female breastfeeding | 8(2.4)                                             |
| Age (years)          |                                                    |
| 13-14                | 1(0.3)                                             |
| 15-24                | 108(32.0)                                          |
| 25-34                | 141(41.7)                                          |
| 35-44                | 71(21.0)                                           |
| 45-49                | 9(2.7)                                             |
| 50+                  | 8(2.4)                                             |
| Residence            |                                                    |
| Urban                | 164(48.5)                                          |
| Rural                | 174(51.5)                                          |
| Previous HIV test    |                                                    |
| ≤12 months           | 189(55.9)                                          |
| >12 months           | 112(33.1)                                          |
| Never tested         | 37(10.9)                                           |
